# Supplementary material
Source: Springer Nature journal article supplement (https://www.springermedizin.de/resource/supplementary/12992_2013_279_MOESM3_ESM.pdf/9616266)
Supplement: MOESM3 [file 9616266]

## General Information

- Program name and summary
- Type of initiative
- Country of operation
- Year established
- Legal and tax exemption status,
- Health focus
- Geography (urban, peri-urban, rural)
- Target population
- Income levels served (by quintile)
- Type(s) of innovation used to serve the poor
- Methods used to distinguish income levels.

## Evaluations

- Whether or not there have been any rigorous evaluations of the initiative's outcomes or quality of services as compared to other health care providers in the country or area of operation.

## Financing

- Sources of revenue
- Does or does not accept insurance
